# Supplementary material for: Transition metal doping activated basal-plane catalytic activity of two-dimensional 1T’-ReS2 for hydrogen evolution reaction: a first-principles calculation study
Source: Royal Society of Chemistry journal article supplement (doi:10.1039/c9nr00997c), 2019-01-01
Supplement: c9nr00997c1.pdf [file c9nr00997c1.pdf]

**ESI for**

**Transition Metal Doping Activated Basal-Plane Catalytic Activity of  
Two-Dimensional 1T'-ReS<sub>2</sub> for Hydrogen Evolution Reaction: A  
First-Principles Calculation Study**

Jing Pan,<sup>1#</sup> Rui Wang,<sup>1#</sup> Xiaoyong Xu,<sup>1</sup> Jingguo Hu,<sup>1\*</sup> Liang Ma<sup>2\*</sup>

<sup>1</sup> College of Physics Science and Technology, Yangzhou University, Yangzhou 225002, China

<sup>2</sup> School of Physics, Southeast University, Nanjing 211189, China

\*Email: [jghu@yzu.edu.cn](mailto:jghu@yzu.edu.cn); [liang.ma@seu.edu.cn](mailto:liang.ma@seu.edu.cn)

---

### The calculated details of LDOS of in-plane S atoms and edge S atoms

To investigate the local density of states (LDOS) of in-plane S atoms and edge S atoms, we built a ReS<sub>2</sub> nanoribbons by cutting from a periodic monolayer ReS<sub>2</sub> along its diamond-shaped (DS) chains direction, with S atoms on both edges, as shown in Fig. S1. A one-dimensional periodic boundary condition is used along with the growth direction, vacuum layers of at least 10 Å are incorporated along the nonperiodic direction to ensure decoupling between neighboring images.

The GGA of the PBE exchange-correlation functional was implemented. The cutoff energy for the plane-wave basis set was 400 eV. Self-consistency was reached once energy difference between two consecutive steps was less than  $1.0 \times 10^{-5}$  eV, and the Hellman-Feynman forces acting on each atom was smaller than 0.01 eV/Å. The Monkhorst-Pack  $k$ -point was set to  $9 \times 1 \times 1$  for the first Brillouin zone integration in geometry optimization and increased to  $31 \times 1 \times 1$  in electronic structure calculations.

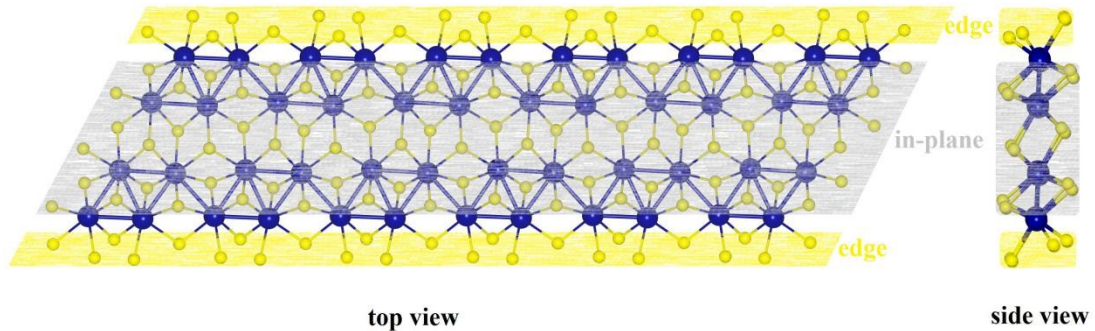

**Fig. S1.** Top and side views of a ReS<sub>2</sub> nanoribbons.

### The calculated details of formation energy of TM-doped ReS<sub>2</sub>

We calculate the formation energy ( $E_{\text{form}}$ ), defined as

$$E_{\text{form}} = E_{\text{tot}}(\text{TM}) - E_{\text{tot}}(\text{ReS}_2) - \sum n_i \mu_i, \quad (1)$$

where  $E_{\text{tot}}(\text{TM})$  and  $E_{\text{tot}}(\text{ReS}_2)$  represent total energy of the doped and undoped ReS<sub>2</sub>,  $n_i$  is the number of atoms that has been added to or removed from the supercell.  $\mu_i$  is the chemical potential of species  $i$  (host or dopant atoms in the bulk phase). Because  $\mu_{\text{host}}$  is greatly depended on experimental growth conditions, we consider the Re-rich and the S-rich conditions, the chemical potential of Re and S under Re-rich conditions can be defined as

$$\mu_{\text{Re}}^{\text{Re-rich}} = \mu_{\text{Re}}, \quad \mu_{\text{S}}^{\text{Re-rich}} = \mu_{\text{S}} + \frac{1}{2} \Delta H_f(\text{ReS}_2), \quad (2)$$

In which,  $\mu_{\text{Re}}$  is the cohesive energy of Re at bulk metallic face-centered-cubic (fcc) structure,  $\mu_{\text{S}}$  is the binding energy of S<sub>2</sub> molecule. Under S-rich conditions,

$$\mu_{\text{Re}}^{\text{S-rich}} = \mu_{\text{Re}} + \Delta H_f(\text{ReS}_2), \quad \mu_{\text{S}}^{\text{S-rich}} = \mu_{\text{S}}, \quad (3)$$

Where,  $\Delta H_f(\text{ReS}_2)$  is the heat of formation of ReS<sub>2</sub> and defined as

$$\Delta H_f(\text{ReS}_2) = \mu_{\text{ReS}_2} - \mu_{\text{Re}} - 2\mu_{\text{S}}, \quad (4)$$

Where,  $\mu_{\text{ReS}_2}$  is equal to  $E_{\text{tot}}(\text{ReS}_2)$  per ReS<sub>2</sub> formula unit.

### The adsorption free energy of hydrogen in TM-doped ReS<sub>2</sub>

Hydrogen adsorption free energy ( $\Delta G_{H^*}$ ) can be defined as

$$\Delta G_{H^*} = \Delta E_H + \Delta E_{ZPE} - T\Delta S_H, \quad (5)$$

where  $\Delta E_{ZPE}$  is the difference in zero-point energy of hydrogen vibration between the adsorbed state and the gas phase,  $T$  is the surface temperature,  $\Delta S_H$  is the entropy difference between the adsorbed state of the system and gas phase at standard condition, with  $\Delta E_{ZPE} - T\Delta S_H = 0.24$  eV at  $T = 300$  K, a reasonable, well established approximation.<sup>1-3</sup> With these values,  $\Delta G_{H^*}$  can be rewritten as:

$$\Delta G_{H^*} = \Delta E_H + 0.24, \quad (6)$$

$$\Delta E_H = E(\text{ReS}_2 + \text{H}) - E(\text{ReS}_2) - E(\text{H}_2)/2, \quad (7)$$

where  $E(\text{ReS}_2 + \text{H})$  and  $E(\text{ReS}_2)$  are the energies of pristine or doped ReS<sub>2</sub> with and without an adsorbed H atom,  $E(\text{H}_2)$  is the energy of a hydrogen molecule in the gas phase.

**Table S1.** The adsorption free energy of hydrogen ( $\Delta G_{H^*}$  in eV), the bond length of S-H  $d_{S-H}$  (Å) and bader charges of S at different six sites for pure and TM-doped ReS<sub>2</sub>.

|                       |                  | 1     | 2     | 3     | 4     | 5     | 6     |
|-----------------------|------------------|-------|-------|-------|-------|-------|-------|
| Pure ReS <sub>2</sub> | $\Delta G_{H^*}$ | 1.45  | 1.64  | 1.60  | 1.67  | 1.65  | 1.78  |
|                       | $d_{S-H}$ (Å)    | 1.363 | 1.390 | 1.392 | 1.375 | 1.397 | 1.411 |
|                       | $q_{bader}$      | 6.532 | 6.450 | 6.468 | 6.469 | 6.452 | 6.416 |
| Mo-doing              | $\Delta G_{H^*}$ | -0.01 | 0.61  | 0.25  | 0.22  | 0.61  | 0.85  |
|                       | $d_{S-H}$ (Å)    | 1.359 | 1.372 | 1.366 | 1.366 | 1.371 | 1.379 |
|                       | $q_{bader}$      | 6.562 | 6.491 | 6.501 | 6.516 | 6.479 | 6.441 |
| Cr-doing              | $\Delta G_{H^*}$ | 0.00  | 0.68  | 0.28  | 0.25  | 0.65  | 0.95  |
|                       | $d_{S-H}$ (Å)    | 1.362 | 1.372 | 1.368 | 1.367 | 1.372 | 1.377 |
|                       | $q_{bader}$      | 6.541 | 6.509 | 6.474 | 6.501 | 6.467 | 6.464 |
| Mn-doing              | $\Delta G_{H^*}$ | 0.72  | 1.22  | 0.73  | 0.89  | 0.98  | 1.07  |
|                       | $d_{S-H}$ (Å)    | 1.363 | 1.370 | 1.367 | 1.372 | 1.379 | 1.388 |
|                       | $q_{bader}$      | 6.507 | 6.483 | 6.433 | 6.470 | 6.447 | 6.430 |
| Fe-doing              | $\Delta G_{H^*}$ | 0.58  | 0.91  | 0.65  | 0.95  | 0.72  | 0.88  |
|                       | $d_{S-H}$ (Å)    | 1.365 | 1.369 | 1.367 | 1.371 | 1.381 | 1.392 |
|                       | $q_{bader}$      | 6.475 | 6.485 | 6.412 | 6.436 | 6.432 | 6.438 |
| Co-doing              | $\Delta G_{H^*}$ | 0.15  | 0.62  | 0.53  | 0.39  | 0.44  | 0.42  |
|                       | $d_{S-H}$ (Å)    | 1.362 | 1.363 | 1.366 | 1.367 | 1.379 | 1.386 |
|                       | $q_{bader}$      | 6.484 | 6.463 | 6.441 | 6.436 | 6.411 | 6.403 |
| Pt-doing              | $\Delta G_{H^*}$ | 0.18  | 0.01  | 0.59  | 0.15  | 0.34  | 0.12  |
|                       | $d_{S-H}$ (Å)    | 1.364 | 1.375 | 1.385 | 1.375 | 1.382 | 1.387 |
|                       | $q_{bader}$      | 6.390 | 6.462 | 6.333 | 6.405 | 6.38  | 6.401 |
| Au-doing              | $\Delta G_{H^*}$ | 0.10  | 0.78  | 0.29  | 0.41  | 0.25  | 0.24  |
|                       | $d_{S-H}$ (Å)    | 1.358 | 1.362 | 1.363 | 1.362 | 1.371 | 1.378 |
|                       | $q_{bader}$      | 6.463 | 6.318 | 6.456 | 6.376 | 6.373 | 6.384 |
| Ag-doing              | $\Delta G_{H^*}$ | 0.07  | 0.32  | 0.16  | 0.34  | 0.36  | 0.28  |
|                       | $d_{S-H}$ (Å)    | 1.360 | 1.366 | 1.364 | 1.66  | 1.373 | 1.380 |
|                       | $q_{bader}$      | 6.517 | 6.405 | 6.472 | 6.431 | 6.383 | 6.386 |

### The comparison of $\Delta G_{H^*}$ in ML-ReS<sub>2</sub> and ML-MoS<sub>2</sub>

As shown in Fig. S2, for ML-ReS<sub>2</sub>, the  $\Delta G_{H^*}$  on different S atoms near the Re atom is different owing to the intrinsic asymmetry in 1T'-ReS<sub>2</sub>. On the contrary, the  $\Delta G_{H^*}$  is equal in ML-MoS<sub>2</sub> contributing from its high symmetric structural properties. Additionally,  $\Delta G_{H^*}$  ranges from 1.45 to 1.78 eV in ML-ReS<sub>2</sub>, which is lower than that of ML-MoS<sub>2</sub> with  $\Delta G_{H^*}$  of 1.91 eV, indicating ReS<sub>2</sub> exhibits higher catalytic activity.

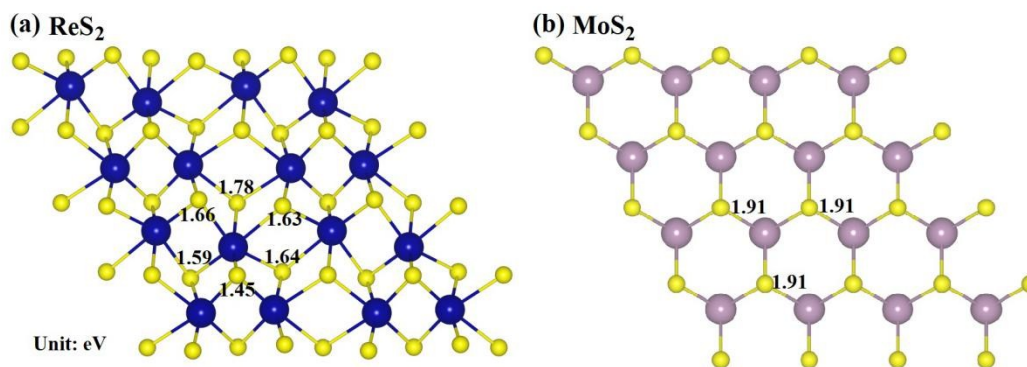

**Fig. S2.** The calculated  $\Delta G_{H^*}$  on different S sites for (a) ML-ReS<sub>2</sub> and (b) ML-MoS<sub>2</sub>.

### SUPPORTING REFERENCES

1. Q. Wang, Z. L. Zhao, S. Dong, D. He, M. J. Lawrence, S. Han, C. Cai, S. Xiang, P. Rodriguez, B. Xiang, Z. Wang, Y. Liang, M. Gu, *Nano Energy*, 2018, **53**, 458.
2. J. K. Norskov, T. Bligaard, A. Logadottir, J. R. Kitchin, J. G. Chen, S. Pandalov, U. Stimming, *Journal of the Electrochemical Society*, 2005, **152** J23.
3. Y. Zhou, W. Chen, P. Cui, J. Zeng, Z. Lin, E. Kaxiras, Z. Zhang, *Nano Lett.* 2016, **16**, 6058
